# Supplementary material for: Double Allogenic Mesenchymal Stem Cells Transplantations Could Not Enhance Therapeutic Effect Compared with Single Transplantation in Systemic Lupus Erythematosus
Source: Hindawi journal article supplement (doi:10.1155/2012/273291), 2012-01-01
Supplement: f1 [file 273291.f1.pdf]

Supplementary material:

In the present study, 8 relapse events occurred in single MSCT group, at 40, 36, 24, 48, 24, 30, 12 and 18 months, respectively. Six relapse events occurred in double MSCT group, at 28, 12, 3, 24, 24 and 9 months, respectively. The detailed information is listed below.

| Single MSCT group |             | Double MSCT group |             |
|-------------------|-------------|-------------------|-------------|
| Time (month)      | Relapse (0) | Time (month)      | Relapse (0) |
| 40                | 0           | 40                | 1           |
| 36                | 1           | 28                | 0           |
| 36                | 1           | 40                | 1           |
| 36                | 0           | 12                | 0           |
| 30                | 1           | 3                 | 0           |
| 48                | 1           | 24                | 0           |
| 48                | 1           | 24                | 0           |
| 24                | 0           | 36                | 1           |
| 48                | 0           | 18                | 1           |
| 30                | 1           | 36                | 1           |
| 24                | 0           | 24                | 1           |
| 30                | 0           | 24                | 1           |
| 24                | 1           | 24                | 1           |
| 24                | 1           | 24                | 1           |
| 12                | 0           | 24                | 1           |
| 18                | 1           | 24                | 1           |
| 18                | 1           | 18                | 1           |
| 18                | 1           | 18                | 1           |
| 18                | 1           | 18                | 1           |
| 18                | 1           | 9                 | 0           |
| 18                | 1           | 18                | 1           |
| 18                | 1           | 18                | 1           |
| 18                | 1           | 18                | 1           |
| 18                | 0           | 18                | 1           |
| 18                | 1           | 12                | 1           |
| 18                | 1           | 12                | 1           |
| 18                | 1           | 12                | 1           |
| 18                | 1           |                   |             |
| 12                | 1           |                   |             |
| 12                | 1           |                   |             |
